# Supplementary material for: Oleanolic acid alleviate intestinal inflammation by inhibiting Takeda G-coupled protein receptor (TGR) 5 mediated cell apoptosis
Source: Royal Society of Chemistry journal article supplement (doi:10.1039/d3fo04882a), 2024-01-01
Supplement: d3fo04882a1.pdf [file d3fo04882a1.pdf]

Materials and Methods

Table S1. Primer Information

| Reference      | Primer                 | Primer sequence (5'-3')                           | Product length (bp) | T <sub>m</sub> (°C) |
|----------------|------------------------|---------------------------------------------------|---------------------|---------------------|
| XM_021099593.1 | Sus scrofa-BCL2-S      | AGGATTGTGGCCTTCTTTGAGT                            | 215.00              | 60.00               |
|                | Sus scrofa-BCL2-A      | AGAGACAGCCAGGAGAAATCAA<br>A                       |                     |                     |
| NM_001206359.1 | Sus scrofa-gapdh-S     | GACATCAAGAAGGTGGTGAAGC<br>A                       | 177.00              | 60.00               |
|                | Sus scrofa-gapdh-A     | GTCGTACCAGGAAATGAGCTTG<br>A                       |                     |                     |
| XM_003127290.5 | Sus scrofa-BAX-S       | AATGGGGGAGAGACACCTG                               | 263.00              | 60.00               |
|                | Sus scrofa-BAX-A       | GGGCCTTGAGCACCAGTTTA<br>GGAAGATTTACTCTACGCTGGT    |                     |                     |
| NM_001244539.1 | Sus scrofa-CLAUDIN-1-S | G                                                 | 141.00              | 60.00               |
|                | Sus scrofa-CLAUDIN-1-A | AAGTGGTGTTCAGATTCAGCAAG<br>G                      |                     |                     |
| NM_001163647.2 | Sus scrofa-OCCLUDIN-S  | TCCACCCATCACTTCAGATCAAC                           | 189.00              | 60.00               |
|                | Sus scrofa-OCCLUDIN-A  | CTATTGTATTCATCAGCAGCAGC<br>C                      |                     |                     |
| XM_021098856.1 | Sus scrofa-ZO1-S       | GTGCCTAAAGCTGTTCTGTGAG                            | 228.00              | 60.00               |
|                | Sus scrofa-ZO1-A       | TAAAGGTGGGAGGATGCTGTTGT<br>GGAAGCAAATCAATGGACTCTG |                     |                     |
| NM_214131.1    | Sus scrofa-CASP3-S     | G                                                 | 271.00              | 60.00               |
|                | Sus scrofa-CASP3-A     | TGCTCCTTTGCTATGGTCTTCT                            |                     |                     |
| XM_013998997.2 | Sus scrofa-casp9-S     | GTGGACATTGGTTCTGGAGGATT                           | 137.00              | 60.00               |
|                | Sus scrofa-casp9-A     | TCATGGCAGAAGTTCACGTTGTT                           |                     |                     |
| NM_001291925.1 | Sus scrofa-PCNA-S      | CTGCAAGTGGAGAACTCGGAA                             | 163.00              | 60.00               |
|                | Sus scrofa-PCNA-A      | GTAGGAGAGAGTGGAGTGGCT                             |                     |                     |
| XM_021073740.1 | Sus scrofa-KI67-S      | CCGTCCCAAGGTCCTGAAGA                              | 252.00              | 60.00               |
|                | Sus scrofa-KI67-A      | AGACCCTGCATCGAGGACAAA                             |                     |                     |
| NM_007393.3    | Mus musculus-β-actin-S | GTGACGTTGACATCCGTAAAGA                            | 287.00              | 60.00               |
|                | Mus musculus-β-actin-A | GTAACAGTCCGCTAGAAGCAC                             |                     |                     |
| NM_174985.1    | Mus musculus-TGR5-S    | CTCATCGTCATCGCCAACC                               | 224.00              | 60.00               |
|                | Mus musculus-TGR5-A    | GCAAGCAGGAAAGGAAACAA                              |                     |                     |
| NM_001163504.1 | Mus musculus-FXR-S     | ACGGCAGACCAACAGACCCT                              | 242.00              | 60.00               |
|                | Mus musculus-FXR-A     | TCCACTGCGGACCCTTTGA                               |                     |                     |
| NM_001278601.1 | Mus musculus-TNFα-S    | CCCTCACACTCACAAACCACC                             | 93.00               | 60.00               |

|                |                              |                         |        |       |
|----------------|------------------------------|-------------------------|--------|-------|
|                | Mus musculus-TNF $\alpha$ -A | CTTTGAGATCCATGCCGTTG    |        |       |
|                | Mus musculus-Bax-S           | TTGCTACAGGGTTTCATCCAGG  |        |       |
| NM_007527.3    | Mus musculus-Bax-A           | GCAAAGTAGAAGAGGGCAACCA  | 275.00 | 60.00 |
|                | Mus musculus-Bcl2-S          | GTTTGATTTCTCCTGGCTGTCTC |        |       |
| NM_009741.5    | Mus musculus-Bcl2-A          | ACTTGTGGCCAGGTATGCA     | 92.00  | 60.00 |
|                | Mus musculus-claudin1-S      | ATGTGGATGGCTGTCATTGGG   |        |       |
| NM_016674.4    | Mus musculus-claudin1-A      | GGACAGGAGCAGGAAAGTAGGA  | 215.00 | 60.00 |
|                | Mus musculus-occludin-S      | ATAATGGGAGTGAACCCGACG   |        |       |
| NM_001360536.1 | Mus musculus-occludin-A      | CGATCCATCTTTCTTCGGGTTT  | 239.00 | 60.00 |
|                | Mus musculus-ZO1-S           | GGGAAAACCCGAAACTGATG    |        |       |
| NM_009386.2    | Mus musculus-ZO1-A           | GCTGTACTGTGAGGGCAACG    | 103.00 | 60.00 |

## Western Blotting

The cells were washed 2-3 times with PBS and then treated with an appropriate volume of RIPA lysis buffer (containing PMSF and phosphatase inhibitors) for 3-5 minutes. The cells were scraped off with a cell scraper and transferred to a 1.5 mL centrifuge tube. The cells were lysed on ice for 30 minutes, followed by centrifugation at 12,000 rpm for 10 minutes at 4°C. The protein concentration was determined using a BCA protein assay kit, following the instructions provided with the kit. The protein solution was mixed with 5 $\times$  Loading Buffer at a 4:1 ratio, denatured at 95°C for 5 minutes, and stored at -20°C. Subsequently, SDS-PAGE and transfer were performed, and the transferred membrane was blocked at room temperature for 30 minutes. After blocking, the primary antibody (Bcl2 [R23309], BAX [R22708],  $\beta$ -actin [T200068-8F10]) was added and incubated overnight at 4°C with shaking. The membrane was washed three times with TBST for 5 minutes each time. The secondary antibody (sheep anti-rabbit [511203] and goat anti-mouse [511103]) was diluted 1:5000 in TBST and added to the incubation chamber, followed

by incubation at room temperature for 30 minutes. The membrane was then washed three times with TBST for 5 minutes each time. ECL A and B solutions were mixed in a 1:1 ratio and used for chemiluminescent detection. The membrane was placed in a chemiluminescent imager, and the chemiluminescent signal was captured. The original image was saved in TIFF format. The antibodies were purchased from Zenbio (Chengdu, China).

## Figures

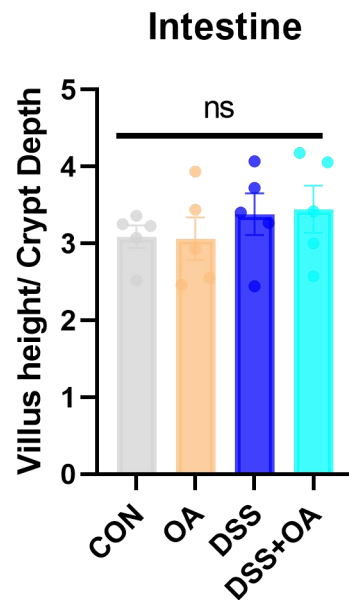

Figure S1. The effect of oleanolic acid (OA) on the ratio of villus height to crypt depth.

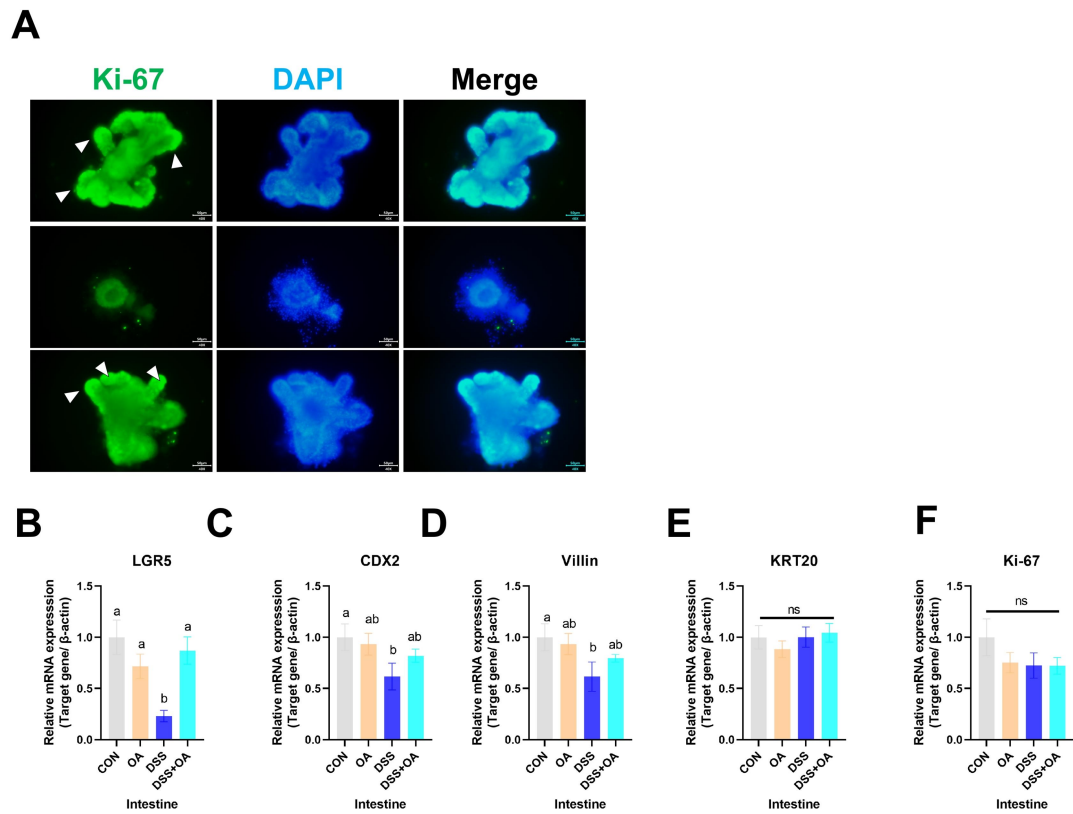

Figure S2. The effect of oleanolic acid (OA) on the organoid formation and expression of functional cell marker genes in the intestine of mice with enteritis. Lgr5: leucine-rich repeat- containing G protein-coupled receptor 5, CDX2:Caudal Type Homeobox 2, KRT-20:Keratin 20.

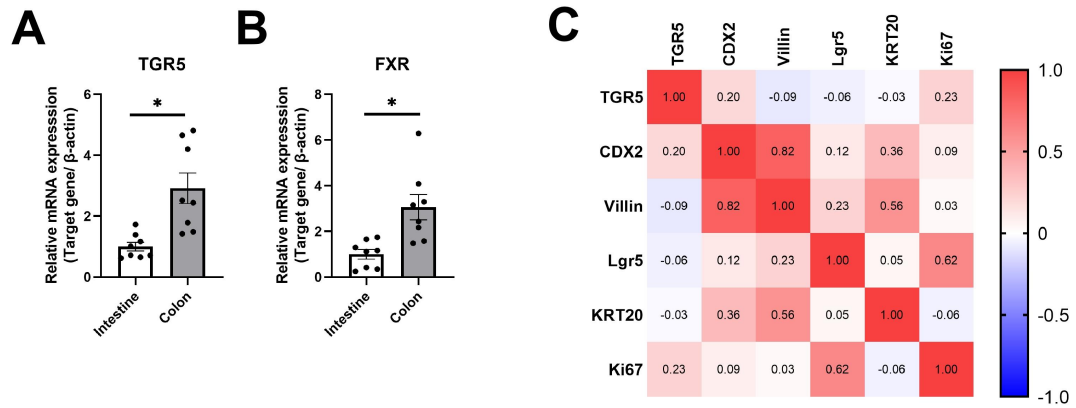

Figure S3. Expression levels of bile acid receptors in the small intestine and colon and their correlation with the expression of functional cell marker genes. (A-B) Gene expression levels of TGR5 and FXR. (C) Pearson correlation analysis of TGR5 with Lgr5, villin, and other marker gene expression levels.

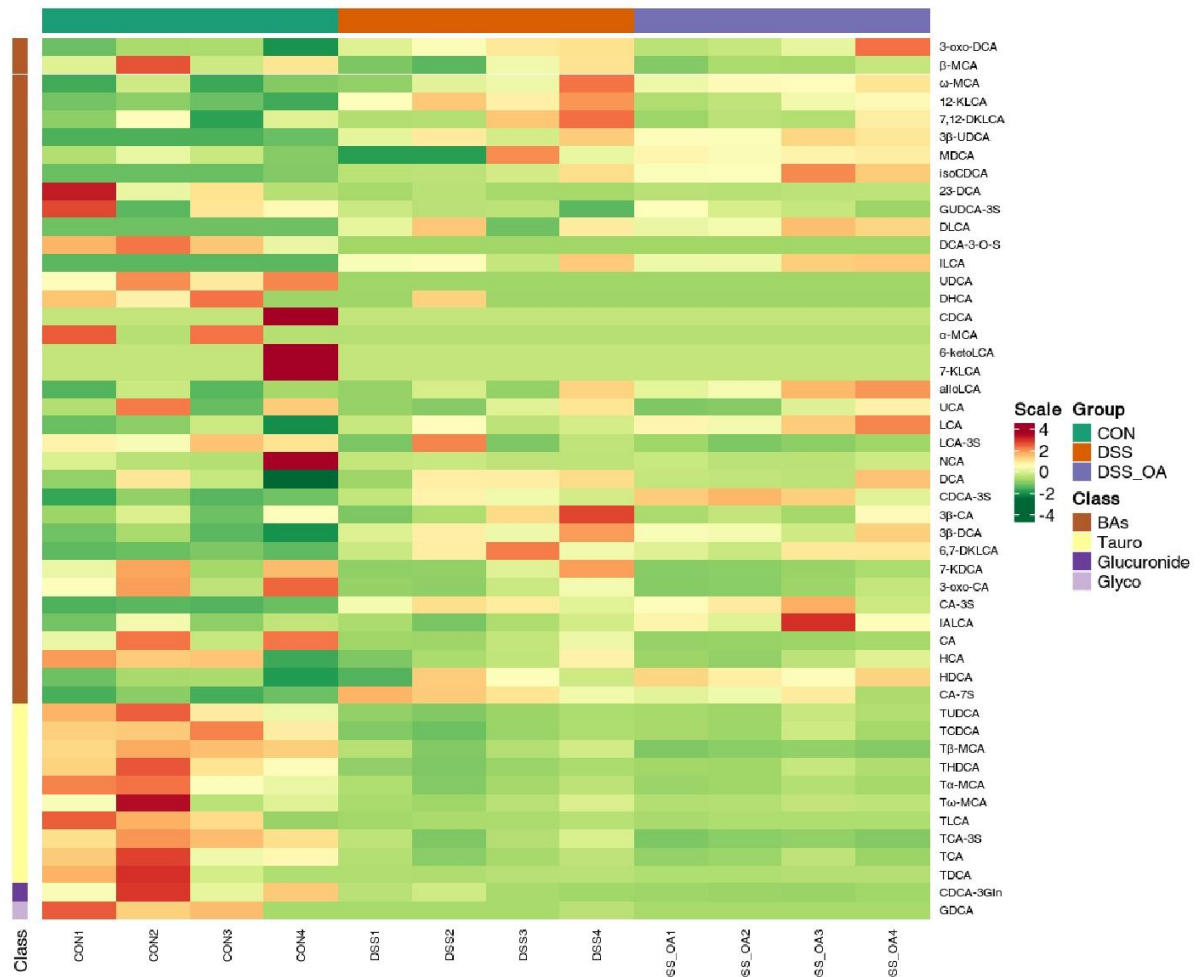

Figure S4: Heatmap illustrating the levels of bile acids in the intestinal contents across different groups.

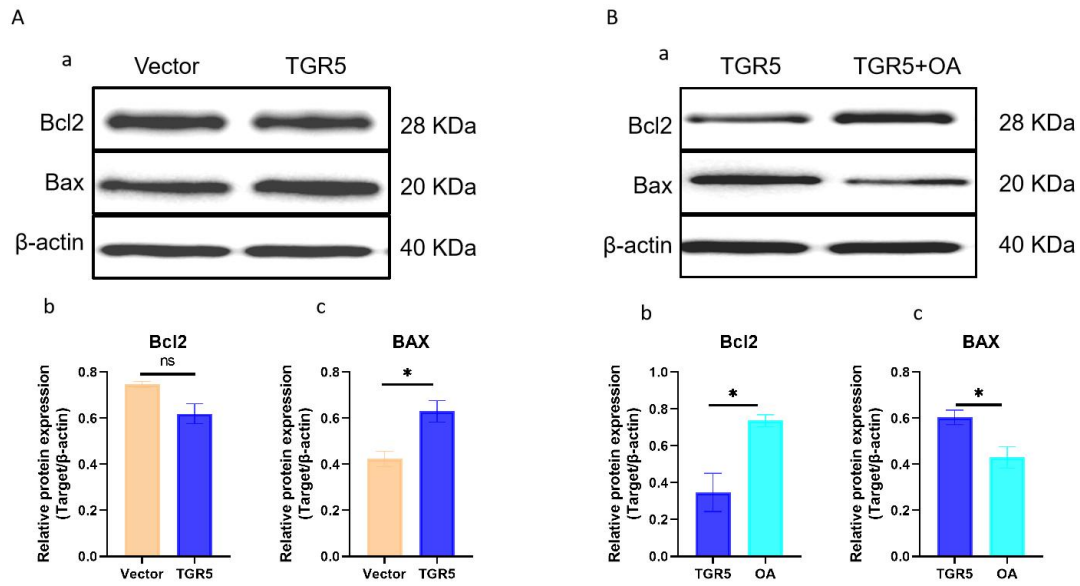

Figure S5. The effect of TGR5 overexpression and OA treatment on the expression abundance of key apoptotic proteins in IPEC-J2 cells. (A) Overexpression of TGR5 upregulates the expression of BAX, but has no significant effect on the protein expression of Bcl2. (B) OA treatment significantly upregulated the protein expression of Bcl2 and downregulated the protein expression of BAX in cells overexpressing TGR5.

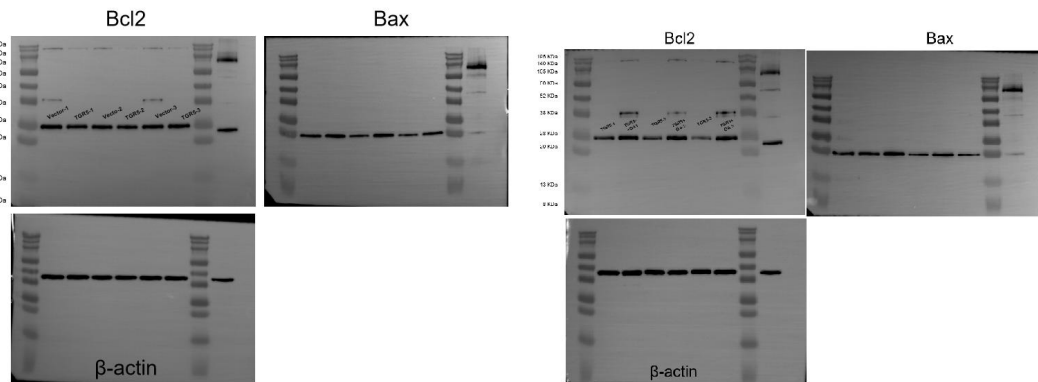

Figure S6. The original picture of protein expression detected by Western blot.
